# Supplementary material for: Noninvasive Electrical Impedance Tomography Monitoring during Total Aortic Arch Replacement: incremental value for prediction of postoperative neurological deficit
Source: Research Square preprint supplement (doi:10.21203/rs.3.rs-7856033/v1), 2026-02-18

**Supplementary Material**

**Surgical Technique**

Our standard operation comprises sternotomy with cardiopulmonary bypass and hypothermic circulatory arrest with antegrade cerebral perfusion (ACP), including unilateral (uni-ACP) and bilateral (bi-ACP). Near-infrared spectroscopy was placed routinely for assessing the adequacy of brain perfusion. A standard cardiopulmonary bypass was established with direct aortic, right subclavian, innominate artery, or femoral arterial cannulation depending on the aortic pathology. Myocardial protection was achieved through antegrade and/or retrograde delivery of cold blood cardioplegia. Cerebral oximetry, as well as bladder and nasopharyngeal temperatures, were routinely monitored. Uni-ACP was achieved through direct cannulation to the innominate, right subclavian artery, or right axillary artery. Bi-ACP was achieved through a complement of direct cannulation to the left common carotid artery. The flow rate for ACP was 5-10 mL/kg/min for both uni-ACP and bi-ACP in all cases when patients were cooled to 18℃ to 25 ℃. Blood pressure during ACP was maintained at around 60 mmHg (50-70 mmHg). Total arch replacement was performed in cases of an entry tear within the aortic arch, involvement of the head vessels or significant arch dilation. A root replacement was performed at the involvement of the coronary ostia or aortic valve, or in the presence of an aortic root aneurysm. Concomitant procedures were performed when required.

**Table S1.** Correlation coefficients for EIT parameters during hypothermic circulatory arrest phase for all patients.

|  | kHCA | ACRHCA | MRAIHCA | TRAIHCA | MRARHCA | ΔTHCA |
| --- | --- | --- | --- | --- | --- | --- |
| ΔARVHCA | 0.982** | -0.279** | -0.042 | 0.001 | -0.023 | 0.137 |
| kHCA | … | -0.298** | -0.030 | 0.013 | -0.010 | 0.120 |
| ACRHCA | -0.298** | … | 0.091 | 0.082 | 0.073 | 0.331 |
| MRAIHCA | -0.030 | 0.091 | … | 0.652** | 0.282** | 0.029 |
| TRAIHCA | 0.013 | 0.082 | 0.652** | … | 0.242** | 0.050 |
| MRARHCA | -0.010 | 0.073 | 0.282** | 0.242** | … | 0.079 |

*means *P* < 0.05; **means *P* < 0.01; ΔARVHCA: the difference of average resistivity value before and after hypothermic circulatory arrest phase; kHCA: the slope of average resistivity value during hypothermic circulatory arrest phase; ACRHCA: the average change rate of average resistivity value during hypothermic circulatory arrest phase; MRAIHCA: the maximum value of the absolute resistivity asymmetric index during hypothermic circulatory arrest phase; TRAIHCA: the time integral of absolute value resistivity asymmetric index during hypothermic circulatory arrest phase; MRARHCA: the maximum value of the absolute resistivity asymmetric ratio during hypothermic circulatory arrest phase; ΔTHCA: the difference of Nasopharyngeal temperature before and after hypothermic circulatory arrest phase.

**Table S2.** Multivariable logistic regression analysis for postoperative neurological deficit.

|  | Univariable model HR (95% CI) | *P*-value | Multivariable model HR (95% CI) | *P*-value |
| --- | --- | --- | --- | --- |
| ACRHCA | 1.196(1.031-1.387) | 0.018 | 1.07(0.97-1.18) | 0.175 |
| MRARHCA | 1.046(0.966-1.132) | 0.268 | 1.23(1.01-1.49) | 0.041 |
| TRAIHCA (AU) | 1.20(1.02-1.42) | 0.029 | 1.29(1.01-1.66) | 0.019 |
| Age, years | 1.04(1.00-1.07) | 0.045 | 1.06(1.02-1.12) | 0.003 |
| BMI, kg/m2 | 1.10(1.01-1.20) | 0.025 | 1.19(1.05-1.34) | 0.003 |
| Syncope | 2.73(0.85-8.79) | 0.092 | 3.02(0.82-11.18) | 0.206 |
| SABV involvement | 3.58(1.56-8.23) | 0.003 | 2.44(1.04-5.71) | 0.026 |
| Operation time, 10 min | 1.11(1.05-1.17) | <0.001 | 1.11(1.02-1.20) | 0.025 |
| CPB time, 10 min | 1.18(1.07-1.31) | 0.001 | 1.05(0.92-1.20) | 0.395 |

ACRHCA: the average change rate of average resistivity value during hypothermic circulatory arrest phase; MRARHCA: the maximum value of the absolute resistivity asymmetric ratio during hypothermic circulatory arrest phase; TRAIHCA: the time integral of absolute value resistivity asymmetric index during hypothermic circulatory arrest phase; BMI: Body mass index; SABV: Supra-aortic branch vessels; Cardiopumonary bypass.

**Table S3.** Arterial cannulation strategy of patients with and without neurological deficit after total aortic arch replacement.

|  | All, n=151 | ND-, n=92 | ND+, n=59 | *P*-value |
| --- | --- | --- | --- | --- |
| Double arterial cannulation | 70 (46.4) | 38 (41.3) | 32 (54.2) | 0.120 |
| Innominate artery cannulation | 100 (66.2) | 64 (69.6) | 64 (61.0) | 0.279 |
| Subclavian artery cannulation | 12 (7.9) | 5 (5.4) | 7 (11.9) | 0.217 |
| Axillary annulation | 17 (11.3) | 10 (10.9) | 7 (11.9) | 0.850 |
| Femoral artery cannulation | 91 (60.3) | 52 (56.5) | 39 (66.1) | 0.240 |

Note: In this study, a subset of the population initially underwent unilateral intubation as their surgical method but subsequently transitioned to bilateral intubation due to insufficient perfusion requirements. The necessity for bilateral intubation in this subset is intrinsically linked to inadequate perfusion.

**Figure S1.** Flow chart of study exclusion and inclusion. Abbreviations: TAAD: Type A aortic dissection; TAAR: Total aortic arch replacement; HCA: Hypothermic circulatory arrest; EIT: Electrical impedance tomography; ND: Neurological deficit


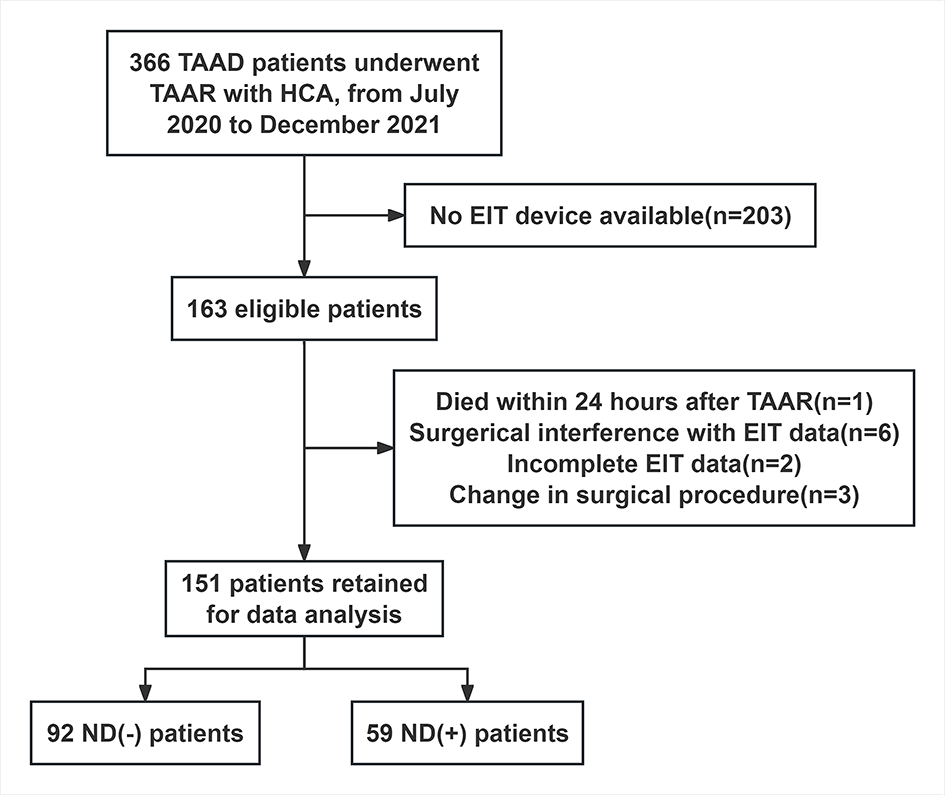


**Figure S2.** Representative computed tomographic images of strokes (white arrow). A: A 53 year old female with normal preoperative brain CT shows a new low-density ischemic infarction in bilateral basal ganglia on brain CT 4 days after surgery; B: A 35 year old male shows a left lateral ventricle infarction on preoperative brain CT, and a newly diagnosed right lateral ventricular (anterior horn) on CT 12 days after surgery; C: Brain CT 11 days after surgery of a 63 year old male (normal preoperative CT omitted) shows bilateral centrum semiovale cerebral infarction and left lateral ventricular (anterior horn) cerebral infarction; D: A 37 year male with normal preoperative brain CT, shows a right centrum semiovale cerebral infarction, a right basal ganglia cerebral infarction (left), and a right temporal lobe cerebral infarction (right) on the CT of 9th day after surgery. Abbreviations: CT: Computed tomography

**
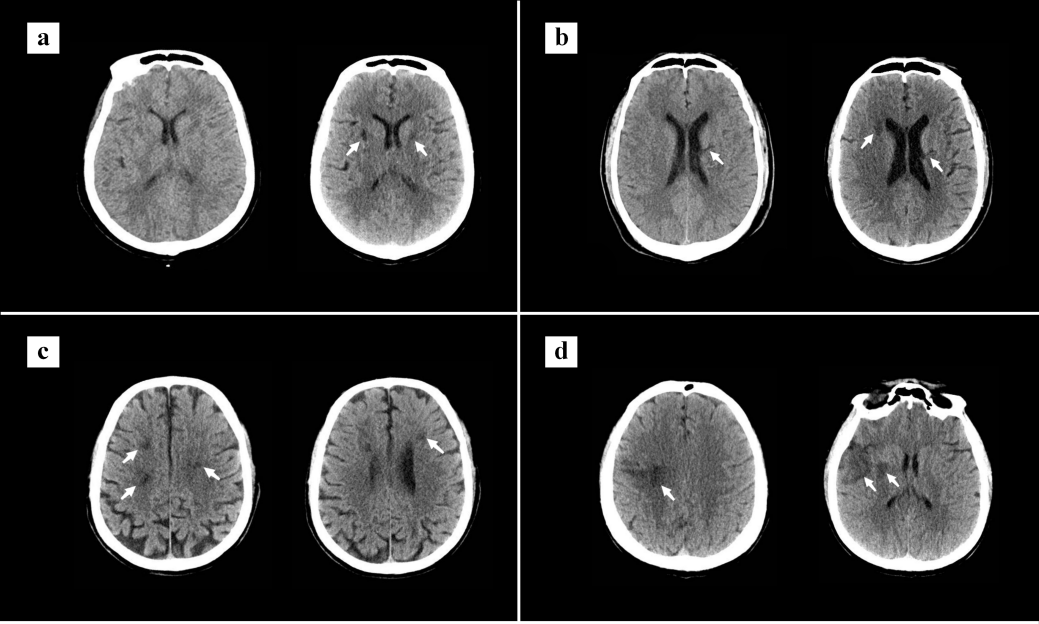
**

**Figure S3.** Set-up of EIT monitoring. (A) The set-up of EIT monitor and NIRS during TAAR. (B) The representative picture of EIT image captured during TAAR. (C) The photo of electrodes placement captured during TAAR. (D) The photo of electrodes. Abbreviations: EIT: Electrical impedance tomography; TAAR: Total aortic arch replacement.


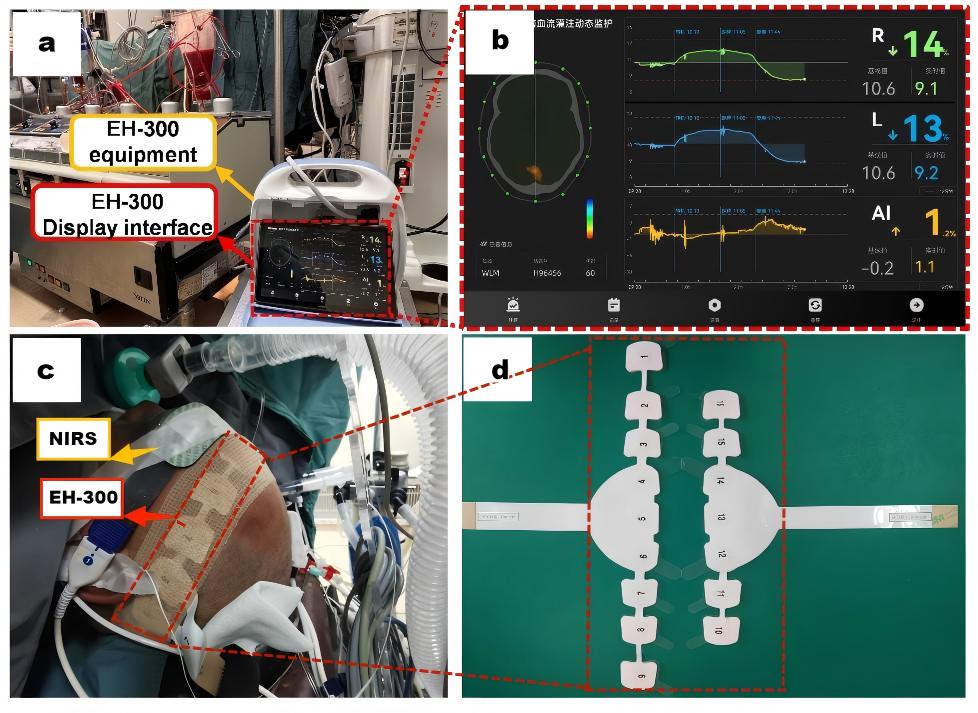

Supplement: Supplementary file 1 [file cb3aab00eee562db4edad4e1.docx]
